# Supplementary material for: Protein expression plasticity contributes to heat and drought tolerance of date palm
Source: Oecologia. 2021 Apr 21;197(4):903–19. doi: 10.1007/s00442-021-04907-w (PMC8591023; doi:10.1007/s00442-021-04907-w)
Supplement: Supplementary file 1 — Supplementary file1 (PDF 965 kb) [file 442_2021_4907_MOESM1_ESM.pdf]

## Supplementary Information:

Article title: **Protein expression plasticity contributes to heat and drought tolerance of date palm**

Authors: Andrea Ghirardo, Tetyana Nosenko, Jürgen Kreuzwieser, J. Barbro Winkler, Jörg Kruse, Andreas Albert, Juliane Merl-Pham, Thomas Lux, Peter Ache, Ina Zimmer, Saleh Alfarraj, Klaus F. X. Mayer, Rainer Hedrich, Heinz Rennenberg, Jörg-Peter Schnitzler

The following Supplementary Information is available for this article:

**Material and Methods MM1:** Reconstruction of the *PdIspS* CDS sequence

**Material and Methods MM2:** *In vitro* enzymatic activity assay of *P. dactylifera IspS* following expression in *E. coli* and protein purification

**Figure S1.** Daily environmental conditions

**Figure S2.** Effects of climate and drought on fresh weight and dry to fresh weight ratio of date palm leaves

**Figure S3.** Comparison of consensus PdIspS protein sequence to functionally characterized plant isoprene synthases

**Figure S4.** Consensus *PdIspS* CDS

**Figure S5.** *PdIspS* protein sequence

**Table S1.** VOC emitted from date palm leaves and log2 of fold changes between treatments

**Table S2.** Proteomic data (*see separate excel file*)

## Material and Methods MM1: Reconstruction of the *PdIspS* CDS sequence

To reconstruct the N- and C-termini of the partial *PdIspS* sequence XP\_008779509.1, we identified close orthologs of this gene from other monocots from the NCBI database (ASF20076.1 and XP\_010923912.1 from *Arundo donax* and *Elaeis guineensis*, respectively) and searched genome sequence data for two *P. dactylifera* varieties (NCBI; Bioprojects PRJNA396270 and PRJNA322046) using terminal parts of these genes. Three contigs from the Khanizi cultivar (PEFZ01192174.1, PEFZ01199267.1, and PEFZ01103933.1) and two unplaced scaffolds from the Khalas cultivar (NW\_008252718.1 and NW\_008252718.1) resulting from this search were assembled in a single pseudo-scaffold. A complete CDS of the *P. dactylifera* putative *IspS* gene was reconstructed based on the RNA-seq reads aligned to this pseudoscaffold. Briefly, to identify samples in which XP\_008779509.1 is expressed, RNA-seq data for the *P. dactylifera* leaf tissue from the Bioprojects PRJEB18007 and PRJEB22923 were obtained from NCBI. All transcript models predicted for the Khalas genome assembly have been indexed and transcript abundance in the aforementioned RNA-seq libraries were quantified using Kallisto v0.44.0 (Bray et al. 2016) using default parameters. Libraries characterized by a high abundance of the XP\_008779509.1 transcripts were selected for further analysis. RNA-seq reads were filtered, quality trimmed using Trimmomatic v.0.35 (Bolger et al. 2014), and mapped to the reference consisting of the *P. dactylifera* genome assembly GCA\_000413155.1 and the *IspS* pseudo-scaffold using STAR v2.5.2a (Dobin et al. 2013). The *IspS* pseudo-scaffold alignment region was extracted from the bam files using SAMtools (Li et al. 2009) and visualized and processed using Integrative Genomics Viewer v2.4.19 (Robinson et al. 2011). The *IspS* coding sequence (CDS) encoded by this pseudo-scaffold was reconstructed based on the consensus of RNA-seq sequences aligned to this region. The *IspS* intron-exon splice sites were defined manually based on the alignments. Nucleotide and amino acid CDS sequences of *PdIspS* are provided in the Supplementary Figs S3-5.

**Material and Methods MM2: *In vitro* enzymatic activity assay of *P. dactylifera* IspS following expression in *E. coli* and protein purification**

Date palm IspS activities were determined at 5mM of the substrate dimethylallyl diphosphate (DMADP) for isoprene biosynthesis or by 5 mM geranyl diphosphate (GDP) for monoterpenes. Each sample contained 50  $\mu$ L protein extract, corresponding to 169  $\mu$ g in the empty vector (EV) control and 174  $\mu$ g in PdIspS samples, respectively, as determined by the Bradford assay. The incubation time was 30 min, and the standard incubation temperature was 40°C. For the temperature dependence analysis of PdIspS, samples were incubated between 20 and 60° with 5°C steps and the respective data collected from EV were used for background corrections. After incubation, the reaction was stopped by removal of the aqueous solution and rinsing the vial with 100  $\mu$ L buffer solution. Finally, the headspace was injected by a self-made autosampler in the inlet of PTR-QMS using N<sub>2</sub> as carrier gas (170 ml min<sup>-1</sup>) for VOC analysis. The PTR-QMS was operated at  $E/N = 132$  Td,  $p\text{-drift} = 2.2$  mbar,  $T\text{drift} = 60$  °C,  $U\text{drift} = 590$  V,  $O_2^+$  and  $NO^+ < 2\%$  of  $H_3O^+$ ;  $H_2OH_3O^+ < 8\%$  of  $H_3O^+$ . Five replicates were analyzed for each sample. Quantitative analysis was achieved by the dilution curve of 11 VOC-mixture standards in N<sub>2</sub> (Apel-Riemer Environmental, Miami, FL, USA) containing isoprene and the monoterpene  $\alpha$ -pinene, diluted between 0-640 ppbv (four-point calibration) by N<sub>2</sub> (5.0 purity) at 90% of rel. humidity and 24°C ( $r^2 > 0.98$ ). For each concentration, standards were produced in triplicate. Calibration curves were performed before and after each analysis. No statistical difference was found between the pre and post-calibration procedures. Therefore, the mean of the instrumental sensitivities was used for final VOC quantification.

### Supplementary Figures:

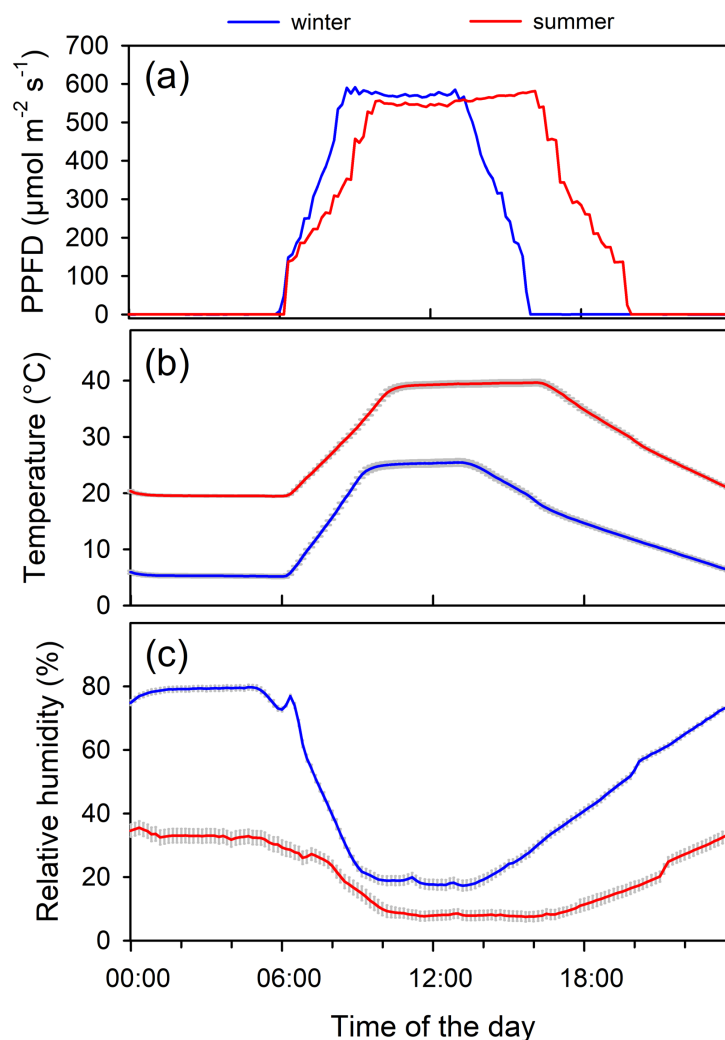

**Figure S1. Daily environmental conditions**

Daily environmental conditions measured during the simulation of winter (in blue) and summer average day (in red) in Saudi Arabia. **(a)** Diurnal variation of light (incident photosynthetically active quantum flux density, PPFD), **(b)** air temperature, and **(c)** relative humidity inside the climate chambers. The environmental conditions represent the mean values of the ten years climate (2003-2012) in Alahsa, Saudi-Arabia, in winter (21.12-21.03) or summer (21.06-21.09). These conditions were repeated throughout the entire experimental period. Data depict means of  $n = 4$  sub-chambers,  $\pm$  s.d.

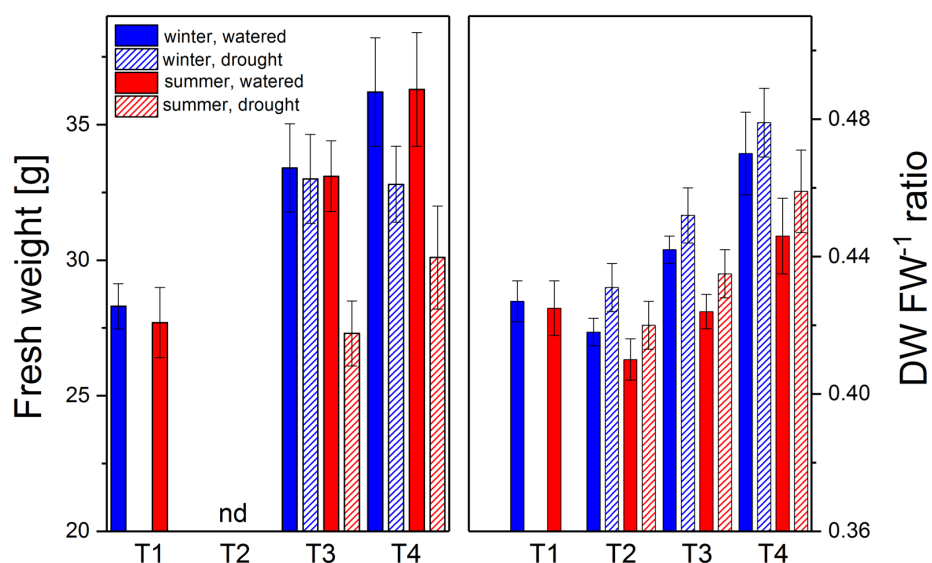

**Figure S2. Effects of climate and drought on fresh weight and dry to fresh weight ratio (DW FW<sup>-1</sup>) of date palm leaves.**

Blue and red colors indicate data obtained from plants growing under winter and summer climate, respectively. Pattern bars refer to drought treatments. T1-T4 indicates sampling times under pre-stress (T1), mild (T2) and severe (T3) drought (T3), and post-drought stress recovery phase as a result of re-watering (T4). Data shown are means  $\pm$  s.e. of 5 plants.

|   |                                |        | F312                                                                                                                                                                                                                          |
|---|--------------------------------|--------|-------------------------------------------------------------------------------------------------------------------------------------------------------------------------------------------------------------------------------|
| 1 | <i>PdIsps</i>                  | 100.0% | LLQFAKVDFTNTQSIHQSEIRKLT <del>FW</del> WKDVLGDKLSFARDRLIEYFFPATGIVFEPHLGYC <del>REELTKAPALVAI</del> DDFYDIYGTPEEINLFTNAVQRWDSNAMEGFPEYMKILYSALYN                                                                              |
| 2 | <i>Arundo donax</i>            | 52.5%  | LIQFAKQDFNNVQSMHTQELAAALTSWMTDVALGEKLT <del>FARDRLIE</del> CPHYANGVMFENLAK <del>CREAITKAPALV</del> VHLD <del>DDVYDV</del> YGTLD <del>DELSLFT</del> TEAMGRWDVSASEALPEYMRATYCTIIN                                               |
| 3 | <i>Eucalyptus globulus</i>     | 48.2%  | ILELALTDNFVQS <del>SYLQRDLQ</del> EMLGWNNNTGLAKRLSPARDRLIE <del>CEFFW</del> AVGIAHEPSLSI <del>CRKAVTKAPAL</del> ILVLD <del>DDVYDV</del> FGTLEEL <del>EFTDAVRR</del> WDLNAVEDLPVYMKLCYLALYN                                    |
| 4 | <i>Melaleuca alternifolia</i>  | 47.4%  | ILELAVMKFNSSQLT <del>QRDLQ</del> EMLGWNNVGLAKRLSPARDRLME <del>CEFFW</del> AVGIAEPALSN <del>CRKGVTKAPSL</del> ILVLD <del>DDVYDV</del> FGTLD <del>DELELFTDAVRR</del> WHD <del>AVENLP</del> GYMKLCFLALYN                         |
| 5 | <i>Populus tremula</i>         | 45.9%  | LLELAILDYNMIQSVYQ <del>RDLRETS</del> RWRRVGLAT <del>KLHFAK</del> DRLIESFYWAVGVAFEPQYSD <del>CRNSVAKMFS</del> FVTIIDDYDVYGTLD <del>DELELFTDAVER</del> WDVNAINDLPYMKLCFLALYN                                                    |
| 6 | <i>Populus alba</i>            | 46.5%  | LLELAILDYNMIQSVYQ <del>RDLRETS</del> RWRRVGLAT <del>KLHFAK</del> DRLIESFYWAVGVAFEPQYSD <del>CRNSVAKMFS</del> FVTIIDDYDVYGTLD <del>DELELFTDAVER</del> WDVNAINDLPYMKLCFLALYN                                                    |
| 7 | <i>Populus fremontii</i>       | 47.4%  | LLELAILDYNMIQSVYQ <del>RDLRETS</del> RWRRVGLAT <del>KLHFAK</del> DRLIESFYWAVGVAFEPQYSD <del>CRNSVAKMFS</del> FVTIIDDYDVYGTLD <del>DELELFTDAVER</del> WDVNAINDLPYMKLCFLALYN                                                    |
| 8 | <i>Casuarina equisetifolia</i> | 47.4%  | LLELATLDFNLVQTS <del>HQEDVKEIS</del> RWKNTGLGEKLSFARDRLME <del>SFLW</del> SAGVMFPQYQY <del>SRRIFTKIF</del> ALITILDDVYDVYGTLD <del>DELELFTNAIER</del> WDNTNTIDQLPYMKICFLTLHN                                                   |
| 9 | <i>Humulus lupulus*</i>        | 43.5%  | LLEFAKLD <del>FNMVQSTHQEDL</del> KHLSRWWRHSLKGEKLN <del>FARDRLME</del> AF <del>LWEV</del> GLKFEPEFSYFKRISARLE <del>VLTITI</del> DDYDVYGTLEEL <del>EFTKAVER</del> WDVNAINELPEYMKMPFLVLHN                                       |
|   |                                |        | V420                                                                                                                                                                                                                          |
| 1 | <i>PdIsps</i>                  | 100.0% | TTNEVADHIHREEGWDALPYLRKAWEDL <del>FN</del> AFLEAKWHYNGYKPALEEYLNNARMSVSGCVLLVHASLLSXORLTKEASQCLKT-YPSLFLSSSEIFRLCNDLATSSAELE <del>RGDTPT</del> SI                                                                             |
| 2 | <i>Arundo donax</i>            | 52.5%  | TSNEMADHVLRE <del>EQQSTQ</del> HLFHK <del>GWHD</del> LCKAFLEAKWHYNGYKPALEEYLNNARMSVSGCVLLVHASLLSXORLTKEASQCLKT-YPSLFLSSSEIFRLCNDLATSSAELE <del>RGDTPT</del> SI                                                                |
| 3 | <i>Eucalyptus globulus</i>     | 48.2%  | SVNEMAYETLKEKGENV <del>IPYLA</del> KAWYDLCKAFLEAKWNSNR <del>IIPG</del> VEEYLNNARMSVSGCVLLVHASLLSXORLTKEASQCLKT-YPSLFLSSSEIFRLCNDLATSSAELE <del>RGDTPT</del> SI                                                                |
| 4 | <i>Melaleuca alternifolia</i>  | 47.4%  | SVNDMAYETLKEKGENV <del>IPYLA</del> KWYDLCKAFLEAKWNSNR <del>IIPG</del> VEEYLNNARMSVSGCVLLVHASLLSXORLTKEASQCLKT-YPSLFLSSSEIFRLCNDLATSSAELE <del>RGDTPT</del> SI                                                                 |
| 5 | <i>Populus tremula</i>         | 45.9%  | TINEIAYDNLKDKGENILPYLT <del>KAWADLCNA</del> FLQEA <del>KWLYNK</del> STPTFFD <del>YFGNAWKS</del> SSG <del>PLQL</del> IFAYFAVQNIKKEE <del>ENLQK</del> -YHDIISRPSHIFRLCNDLASASAB <del>IARGETANSV</del>                           |
| 6 | <i>Populus alba</i>            | 46.5%  | TINEIAYDNLKDKGENILPYLT <del>KAWADLCNA</del> FLQEA <del>KWLYNK</del> STPTFFD <del>YFGNAWKS</del> SSG <del>PLQL</del> IFAYFAVQNIKKEE <del>ENLQK</del> -YHDIISRPSHIFRLCNDLASASAB <del>IARGETANSV</del>                           |
| 7 | <i>Populus fremontii</i>       | 47.4%  | TINEIAYDNLKDKGENILPYLT <del>KAWADLCNA</del> FLQEA <del>KWLYNK</del> STPTFFD <del>YFGNAWKS</del> SSG <del>PLQL</del> IFAYFAVQNIKKEE <del>ENLQK</del> -YHDIISRPSHIFRLCNDLASASAB <del>IARGETANSV</del>                           |
| 8 | <i>Casuarina equisetifolia</i> | 47.4%  | SINEIAYDILRERG <del>VNIP</del> SLRK <del>VW</del> DL <del>CRSFL</del> LEAT <del>WYHKKHTPT</del> FE <del>EYLNAWKS</del> SSG <del>PLQL</del> IFAYFAVQNIKKEE <del>ENLQK</del> -YHDIISRPSHIFRLCNDLASASAB <del>IARGETANSV</del>    |
| 9 | <i>Humulus lupulus*</i>        | 43.5%  | TINEMAFDVLGQ <del>DNFLNIEYLK</del> SLVDLCKCYLQEA <del>KWYSGYQ</del> PTLQ <del>EYIEMAWLS</del> TGGPVILVHYAFCPTNPITKESMKFTEGYENLIQ <del>QSC</del> LI <del>VR</del> LAD <del>DG</del> GTFSDE <del>LN</del> RGD <del>V</del> PKSI |
|   |                                |        | F459                                                                                                                                                                                                                          |
|   |                                |        | T479                                                                                                                                                                                                                          |
| 1 | <i>PdIsps</i>                  | 100.0% | QCYMQDNGVSEAVARNGIQDLIINS <del>WKKLN</del> KEAVDCHPLPRYIANAAINLGRISHCTYHKDGLGAPDQEKKNMIKSLFFDPVALKGGQDSLG <del>LDD</del> DRFVVS <del>NV</del>                                                                                 |
| 2 | <i>Arundo donax</i>            | 52.5%  | AIYMLENNADEQESRAMHEYTIDI <del>WKS</del> VNEEAFCHHHYKPSFRKACLNLSRISHCTYQGGDGLGAPDDEKKQIKELFLEPCIF-----                                                                                                                         |
| 3 | <i>Eucalyptus globulus</i>     | 48.2%  | RCFMQEKGISLEARECVKEEIDTA <del>WKMN</del> KYMDRSTFFNQSFVRMTYNLARMAHCVYQDGAIGSPDDL <del>SWNRVHSLI</del> KPISPAA-----                                                                                                            |
| 4 | <i>Melaleuca alternifolia</i>  | 47.4%  | LCYMRKGFSESEARQVIEQIDTA <del>WRQMN</del> KYMDRSTFFNQSFVRMTYNLARMAHCVYQDGAIGSPDDL <del>SWNRVHSLI</del> KPISPAA-----                                                                                                            |
| 5 | <i>Populus tremula</i>         | 45.9%  | SCYMRKGISSEELATESVMN <del>LIDETCK</del> MNKEKLGGS <del>LFAKPF</del> VETA <del>INLARQSHCTYHNG</del> DAHTSPDELTRKRVLSVITEPILPFER-----                                                                                           |
| 6 | <i>Populus alba</i>            | 46.5%  | SCYMRKGISSEELATESVMN <del>LIDETCK</del> MNKEKLGGS <del>LFAKPF</del> VETA <del>INLARQSHCTYHNG</del> DAHTSPDELTRKRVLSVITEPILPFER-----                                                                                           |
| 7 | <i>Populus fremontii</i>       | 47.4%  | SCYMRKGISSEELATESVMN <del>LIDETCK</del> MNKEKLGGS <del>LFAKPF</del> VETA <del>INLARQSHCTYHNG</del> DAHTSPDELTRKRVLSVITEPILPFER-----                                                                                           |
| 8 | <i>Casuarina equisetifolia</i> | 47.4%  | QCYMHETGKSQESRKYISS <del>LITETW</del> KMNKERAVGSS <del>LQTYVE</del> IGINLARTAQCMYQHG <del>DGLSV</del> SDRET <del>KDRIQSV</del> LINPIPLR-----                                                                                  |
| 9 | <i>Humulus lupulus*</i>        | 43.5%  | QCYMYDTGASEDEAREHIKFLIC <del>ETW</del> KDMNKND <del>EDNSC</del> SETFVEVCNKLARTALFMYQYGDGHASQNC <del>LKERIFALI</del> INPINFERK-----                                                                                            |

**Figure S3. Comparison of consensus PdIsps protein sequence to functionally characterized plant isoprene synthases**

Multiple sequence alignment of the C-terminal domain (Class I terpenoid synthase fold). Red shading indicates residues of the diagnostic tetrad. Numbers in bold refer to the positions in the amino acid sequence of the *PdIsps* protein precursor. The purple shading indicates conserved TPS motifs: RXR, DDXXD and DTE/NSE. Dots represent residues that are identical to those in *PdIsps*. A star indicates the *Humulus lupulus* myrcene synthase, which shows a minor *IspS* activity (Sharkey et al. 2013). NCBI accession numbers of genes included in the alignment are: *Arundo donax* ASF20076.1, *Eucalyptus globulus* BAF02831.1, *Melaleuca alternifolia* AAP40638.1, *Populus tremula* CAC35696, *P. alba* ADG96473.1, *P. fremontii* AEK70967.1, *Casuarina equisetifolia* BAS30549.1, and *Humulus lupulus* ACI32638.1.

ATGGCACTCTCTACATGCTTCGCATCCACCGCATGTCATGCCGGGAGCAAAGGTT  
GGGTGGTGGCAAGTCAAGTCCGTTCCCAACCTCCGACGAGGCGATCGGCAAATTA  
 TCAGCCTAGCTCATGGGACTATGACTCCCTTCAGTCTTTGAGGGGTGGCGACTTG  
 AACGGGACACACACGACACACTTGGAAAAGTTGAAGGAGAACACGAGGCACTTG  
 CTATCCAAGGAGGCTGAACCAGTGGCTCGACTTAAGCTGGTCGACGTCCTGCAGC  
 GTCTTGGTGTGGGTTATCACTTTGAGGAGGAGATCAAGGATGCCCTTGGCTCGAT  
 GCCCATTGAGAGGGCAAACACATTGTTCAAAGACGACATCCACTCCATGTCTTTG  
 CTATTTAGACTGCTTAGAGAGCACGGGTTTCCCTGTTTCCCCAGACATCTTCAGTAG  
 CTTGAAAGAAGAGAACGGTAACCTTCAAGGCAAGCCTTCTCAGGGACACTCAAGC  
 ATTATTATCCCTACATGAGGCTTCATATCTTGCTTTTGAAGGAGAAACACTGCTGG  
 ATGAAGCAAGAATTTTCACAATAAATATCTCAGCGATCTCAAGCTACAGATGGA  
 TCCACACCTTAAGGGAAAAGTKTCTCTATCTTTGGATCTTCCTTTGCACTGGAGGA  
 CTCCAAGGTTGGAAGCAAGATGGCACATAGATCAGTATGAAAGAGATGGAAACA  
 TGGACCATAYGCTTCTTCAATTTGCTAAGGTCGATTTCAACACAGTGCAAAGCAT  
 ACACCAAAGTGAAATTAGAAAACCTGACAAGGTGGTGGAAAGATGTAGGCCTTGG  
 GGATAAATTGAGCTTTGCTAGAGATCGATTGATAGAGTACTTCTTCTTTGCAACTG  
 GAATTGTATTTCGAGCCGCATCTTGGATATTGTTCGAGAGGAACTTACTAAAGCATT  
 TGCTTTGGTAGCAATTATAGATGATTTCTATGATATTTACGGAACACCGGAAGAG  
 CTTAACCTTTTCACCAAYGCCGTCCAGAGGTGGGACTCCAATGCAATGGAAGGCT  
 TTCCAGAGTAYATGAAAATCTTGTATTTCAGCTTTGTACAACACAACYAATGAAGT  
 GGCRGATCACATACATAGAGAAGAGGGYTGGGATGCCCTTCCTTATCTCAGAAA  
 AGCGTGGGAGGACCTATTCAACGCCTTCCTAACGGAGGCAAAGTGGCATTACAA  
 CGGCTACAAACCAGCCCTCGAGGAGTATCTAAACAATGCYCGGATGTCAGTSTCA  
 GGCTGCGTCCTATTAGTCCATGCTAGCCTCTTATCAASGCAGAGACTAACYAAGG  
 AGGCATCGCAGTGCTTGAAGACCTATCCAAGCCTCTTCCTGTCTCATCCGAGAT  
 CTTTCGTCTTTGCAATGATTTAGCCACTTCTTCGGCAGAGTTAGAGAGAGGTGATA  
 CTCCAACATCCATCCAATGCTACATGCAAGACAATGGTGTMTCCGAGGCAGTTGC  
 TCGCAATGGCATTCAAGATTTAATCATTAATTCATGGAAGAAGCTGAACAAAGAA  
 GCTGTTGATTGCCATCCACTCCCTCGATACATTGCTAATGCAGCCATAAATCTTGG  
 ACGGATATCGCATTGCACATACCATAAGGGAGATGGCTTGGGTGCTCCAGATCAA  
 GAGAAGAAGAATATGATCAAGTCCCTGTTTTTTGATCCTGTAGCACTCAAAGGAG  
 GCCAGGAYTCTTTAGGGCTTCTTGATGATAGGTTTGTGGTCAGCAATGTGTAG

**Figure S4. Consensus *PdIspS* CDS**

The coding sequence of isoprene synthase in *Phoenix dactylifera* (*PdIspS*). The sequence encoding predicted plastid-targeted peptide is underlined.

MALSTCFASTACHAGSKGWVVASQVRSQPPTRRSANYQPSSWDYDSLQSLRGGDLN  
 GTHTTHLEKLKENTRHLLSKEAEPVARLKLVDVLQRLGVGYHFEEEIKDALGSMPIE  
 RANTLFKDDIHMSLLFRLREHGFPVSPDIFSSLKEENGNFKASLLRDTQALLSLHEA  
 SYLAFEGETLLDEARIFTTKYLSDLKLQMDPHLKGKVSLSLDLPLHWRTPRLEARWHI  
 DQYERDGNMDHXLLQFAKVDFNTVQSIHQSEIRKLTRWWKDVGLGDKLSFARDRLI  
 EYFFFATGIVFEPHLGYCREELTKAFALVAIIDDFYDIYGTPEELNLFTNAVQRWDSNA  
 MEGFPEYMKILYSALYNTTNEVADHIHREEGWDALPYLRKAWEDLFNAFLTEAKWH  
 YNGYKPALEEYLNARMSSVSGCVLLVHASLLSXQRLTKEASQCLKTYPSTLFLSSSEIF  
 RLCNDLATSSAELERGDTPTSIQCYMQDNGVSEAVARNGIQDLIINSWKKLNKEAVD  
 CHPLPRYIANAANLGRISHCTYHKGDGLGAPDQEKKNMIKSLFFDPVALKGGQDSL  
 GLLDDRFVVSNNV\*

**Figure S5. *PdIspS* protein sequence**

Amino acid sequence of the isoprene synthase in *Phoenix dactylifera* (*PdIspS*). The predicted plastid-targeted peptide is underlined. The TargetP cleavage site probability was 0.722.

### Supplementary Table:

**Table S1. VOC emitted from date palm leaves and log<sub>2</sub> of fold changes between treatments.**

Volatiles were collected on VOC adsorbents from enclosed palm leaves under standard conditions (T= 30 °C; 400 ppm; 1,000  $\mu\text{mol m}^{-2} \text{s}^{-1}$  PPFD) and analyzed by GC-MS analysis. No indicate compounds shown in Figure 2 (biplot of PCA). Increased and decreased emissions due to treatments are indicated by the intensity of red and blue colors, respectively. Significant differences between treatments at  $p < 0.05$  as calculated by non-parametric  $t$ -test are indicated in bold.

| No | Compound                           | Summer/<br>Winter<br>Control | Summer<br>drought/<br>Control | Winter<br>drought/<br>Control |
|----|------------------------------------|------------------------------|-------------------------------|-------------------------------|
| 1  | Acetaldehyde                       | -0.47                        | -1.00                         | -0.59                         |
| 2  | Ethanol                            | 0.21                         | -1.64                         | -3.76                         |
| 3  | Isoprene                           | 0.54                         | -0.44                         | -0.08                         |
| 4  | 1-Butene, 2-methyl-                | -0.10                        | -2.21                         | -3.30                         |
| 5  | 2-Propanone                        | 0.33                         | -1.28                         | -1.88                         |
| 6  | 3-Hexene, Z-                       | 0.07                         | -2.27                         | -2.57                         |
| 7  | 2-Hexene                           | 0.08                         | -2.34                         | -2.64                         |
| 8  | 2-Pentene, 3-methyl-, E-           | 0.06                         | -2.40                         | -2.64                         |
| 9  | Butane, 2,2,3-trimethyl-           | 0.28                         | -2.29                         | -2.62                         |
| 10 | Cyclopentane, methyl-              | -0.32                        | 0.18                          | 0.64                          |
| 11 | Cyclohexane                        | -0.15                        | 0.49                          | 0.67                          |
| 12 | 1-Pentene, 2,4,4-trimethyl-        | -0.02                        | -0.28                         | -0.39                         |
| 13 | 2-Pentene, 2,3,4-trimethyl-        | 0.45                         | -1.43                         | -2.34                         |
| 14 | 1,2,4-Trimethyl-cyclopentane       | -1.52                        | -0.94                         | 0.34                          |
| 15 | trans-4,4-Dimethyl-2-hexene        | 0.07                         | -1.96                         | -2.37                         |
| 16 | Heptane, 2,4-dimethyl-             | -0.41                        | -0.27                         | -0.08                         |
| 17 | 1-Hexene, 4,5-dimethyl-            | 0.31                         | -0.85                         | -1.43                         |
| 18 | 1-Hexene, 3,4-dimethyl-            | 0.33                         | -1.07                         | -1.82                         |
| 19 | Cyclohexane, 1-methyl-3-pentyl-    | 0.44                         | -0.25                         | -1.19                         |
| 20 | 4-Undecanol, 7-ethyl-2-methyl-     | -0.01                        | -0.84                         | -1.24                         |
| 21 | Benzene, 1-methyl-4-1-methylethyl- | 0.08                         | -0.72                         | -1.34                         |

**Table S2. Proteomic data.***See separate excel file***References:**

- Bolger AM, Lohse M, Usadel B (2014) Trimmomatic: A flexible trimmer for Illumina sequence data. *Bioinformatics* 30:2114–2120. <https://doi.org/10.1093/bioinformatics/btu170>
- Bray NL, Pimentel H, Melsted P, Pachter L (2016) Near-optimal probabilistic RNA-seq quantification. *Nat Biotechnol* 34:525–527. <https://doi.org/10.1038/nbt.3519>
- Dobin A, Davis CA, Schlesinger F, et al (2013) STAR: Ultrafast universal RNA-seq aligner. *Bioinformatics* 29:15–21. <https://doi.org/10.1093/bioinformatics/bts635>
- Ghirardo A, Koch K, Taipale R, et al (2010) Determination of de novo and pool emissions of terpenes from four common boreal/alpine trees by  $^{13}\text{CO}_2$  labelling and PTR-MS analysis. *Plant cell Environ* 33:781–792. <https://doi.org/10.1111/j.1365-3040.2009.02104.x>
- Ghirardo A, Wright LP, Bi Z, et al (2014) Metabolic flux analysis of plastidic isoprenoid biosynthesis in poplar leaves emitting and nonemitting isoprene. *Plant Physiol* 165:37–51. <https://doi.org/10.1104/pp.114.236018>
- Li H, Handsaker B, Wysoker A, et al (2009) The Sequence Alignment/Map format and SAMtools. *Bioinformatics* 25:2078–2079. <https://doi.org/10.1093/bioinformatics/btp352>
- Mayrhofer S, Teuber M, Zimmer I, et al (2005) Diurnal and seasonal variation of isoprene biosynthesis-related genes in grey poplar leaves. *Plant Physiol* 139:474–484. <https://doi.org/10.1104/pp.105.066373.474>
- Robinson JT, Thorvaldsdóttir H, Winckler W, et al (2011) Integrative genomics viewer. *Nat Biotechnol* 29:24–26. <https://doi.org/10.1038/nbt.1754>
- Schnitzler J-P, Zimmer I, Bachl A, et al (2005) Biochemical properties of isoprene synthase in poplar (*Populus x canescens*). *Planta* 222:777–786. <https://doi.org/10.1007/s00425-005-0022-1>
